# Supplementary material for: Lipophilized Epigallocatechin Gallate Derivative Exerts Anti-Proliferation Efficacy through Induction of Cell Cycle Arrest and Apoptosis on DU145 Human Prostate Cancer Cells
Source: PubMed Central journal article supplement (PMC7020104; doi:10.3390/nu12010092), 2019-12-28
Supplement: nutrients-12-00092-s001.pdf [file nutrients-12-00092-s001.pdf]

Supplementary Table 1. <sup>1</sup>H and <sup>13</sup>C Chemical Shifts (δ) of EGCG and Tetralauroyl EGCG

| C/H position | EGCG           |                 | Tetralauroyl EGCG |                 |
|--------------|----------------|-----------------|-------------------|-----------------|
|              | <sup>1</sup> H | <sup>13</sup> C | <sup>1</sup> H    | <sup>13</sup> C |
| 2            | 5.11           | 78.55           | 5.20              | 77.60           |
| 3            | 5.51           | 70.00           | 5.49              | 69.55           |
| 4            | 2.89           | 25.42           | 2.96              | 26.64           |
|              | 2.93           |                 | 3.00              |                 |
| 5            |                | 157.49          |                   | 157.39          |
| 6            | 6.06           | 96.59           | 6.06              | 96.89           |
| 7            |                | 157.99          |                   | 157.90          |
| 8            | 6.01           | 95.69           | 6.01              | 95.93           |
| 9            |                | 156.40          |                   | 156.89          |
| 10           |                | 99.27           |                   | 99.28           |
| 1'           |                | 130.89          |                   | 131.47          |
| 2'           | 6.56           | 106.58          | 7.00              | 106.94          |
| 3'           |                | 146.43          |                   | 150.82          |
| 4'           |                | 133.68          |                   | 131.50          |
| 5'           |                | 146.43          |                   | 150.82          |
| 6'           | 6.56           | 106.58          | 7.00              | 106.94          |
| 1''          |                | 121.87          |                   | 121.25          |
| 2''          | 7.05           | 108.78          | 7.45              | 108.90          |
| 3''          |                | 146.26          |                   | 151.35          |
| 4''          |                | 139.19          |                   | 137.87          |
| 5''          |                | 146.26          |                   | 151.35          |
| 6''          | 7.05           | 108.78          | 7.45              | 108.90          |
| COO          |                | 165.56          |                   | 165.82          |

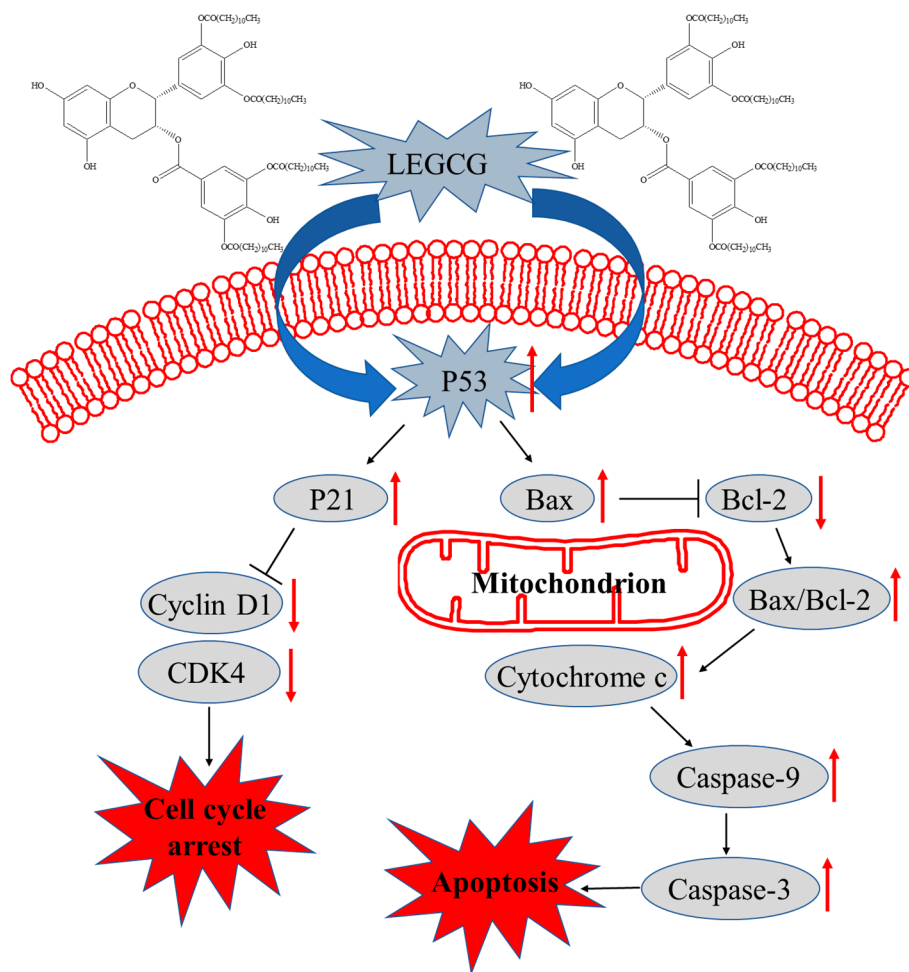

Supplementary Figure 1. The proposed signaling pathway triggered by LEGCG on DU145 cells.
